# Supplementary figures and images for: Investigation on Purification of Saturated LiNO3 Solution Using Titanium Phosphate Ion Exchanger: Kinetics Study
Source: MDPI journal article supplement (doi:10.3390/ijms232113416), 2022-11-02

## Supporting Information

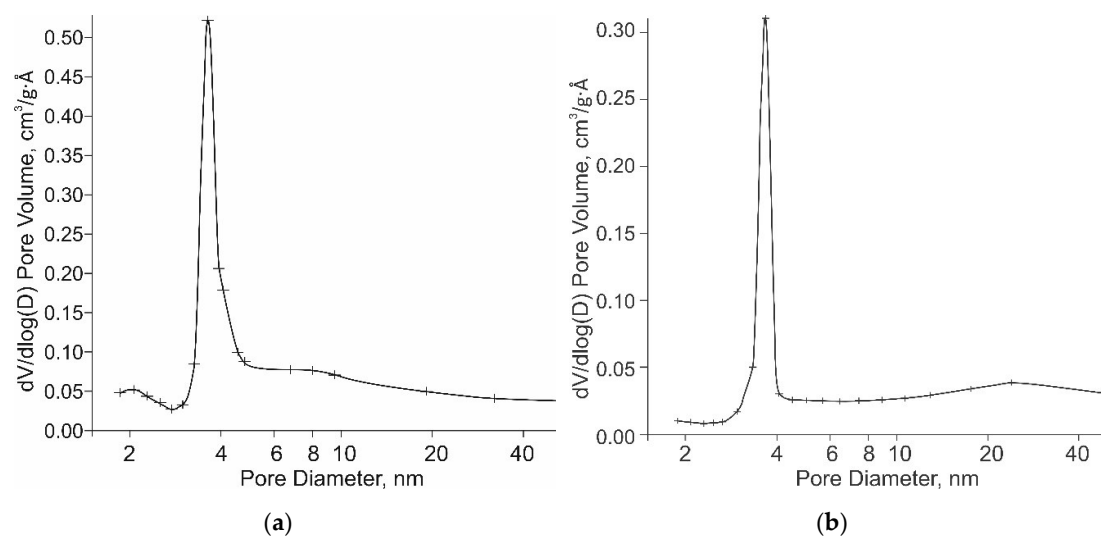

**Figure S1.** The pore size distribution plots for TiOP (a), and Li-TiOP (b).

Supplement: s1 [file s1]
